# Supplementary material
Source: ML conference proceedings conference paper supplement (https://openreview.net/forum?id=319xcX5qIcO)

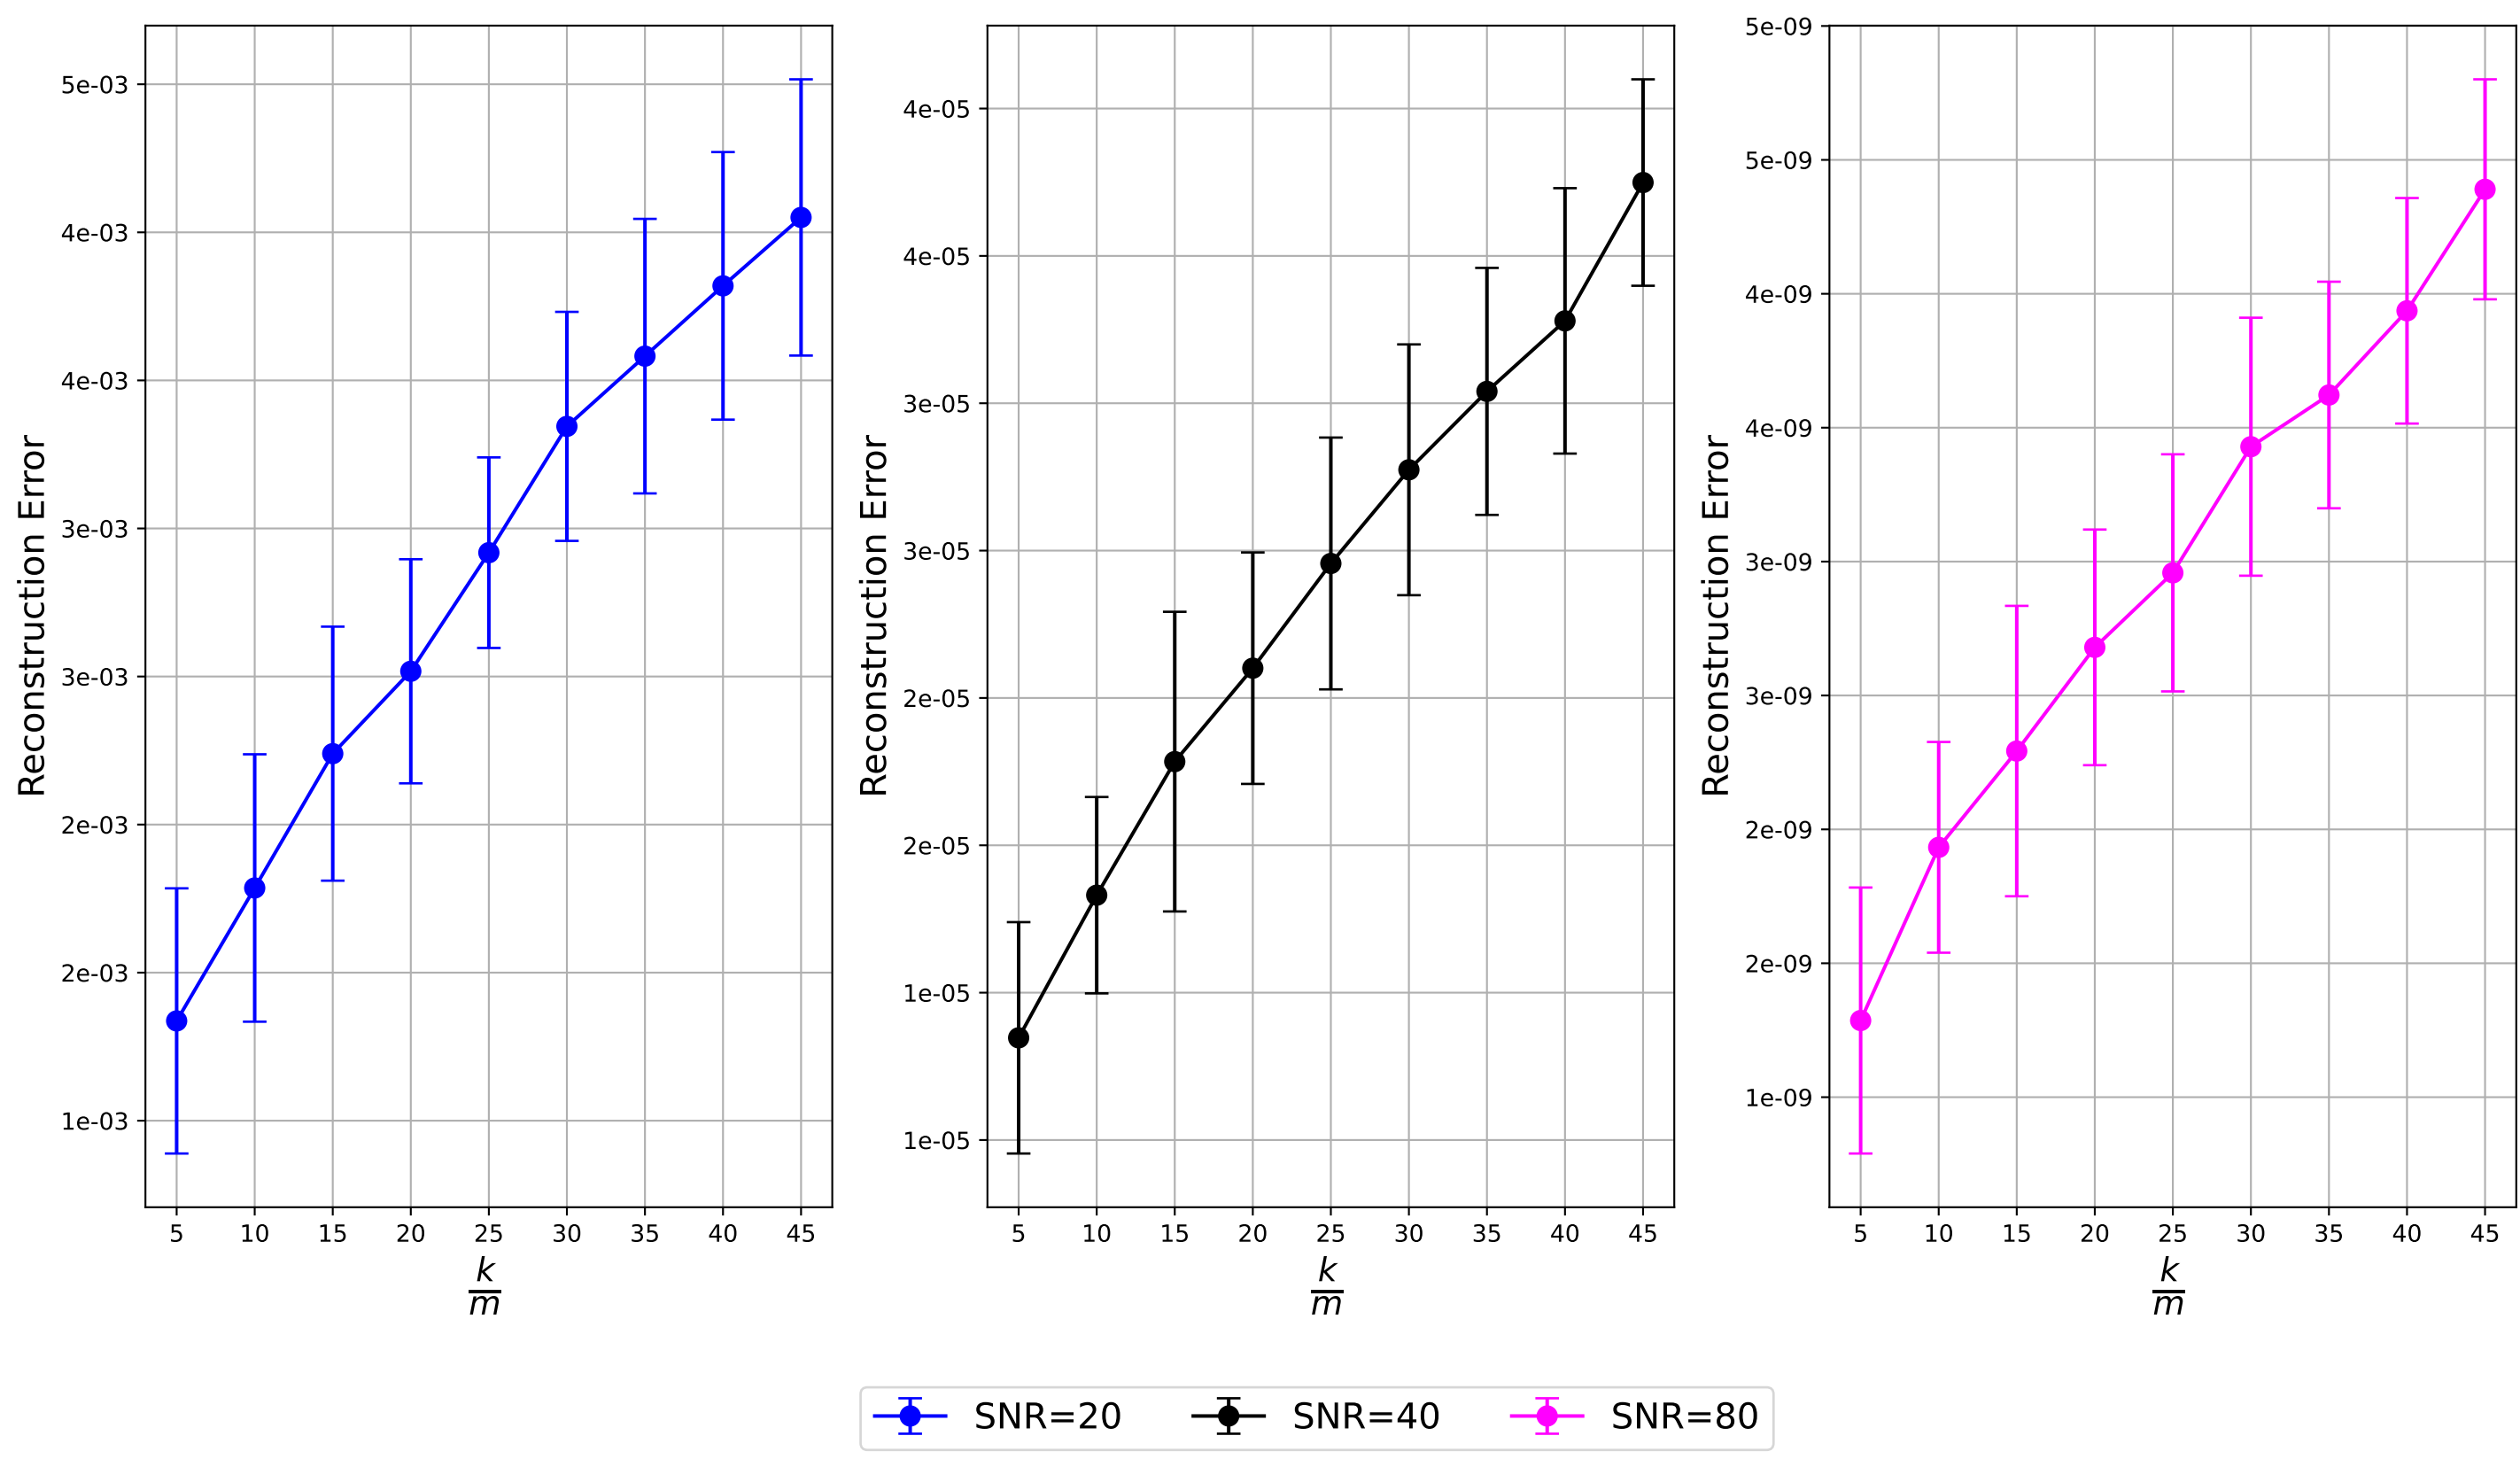

Supplement: supplementary_material [file attachment]

Probability of Success

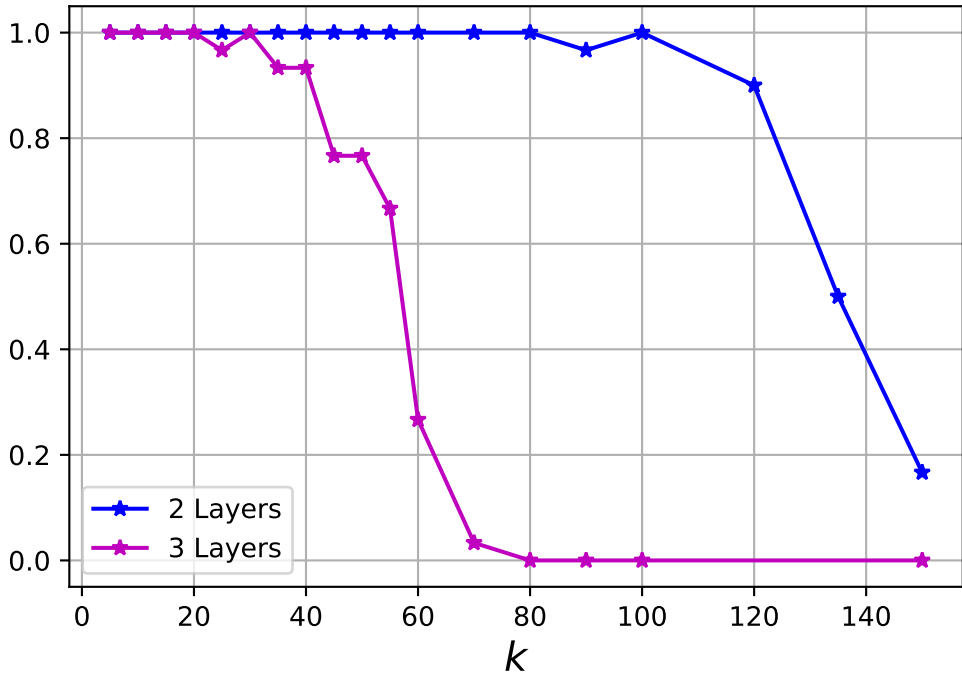

Supplement: supplementary_material [file attachment]

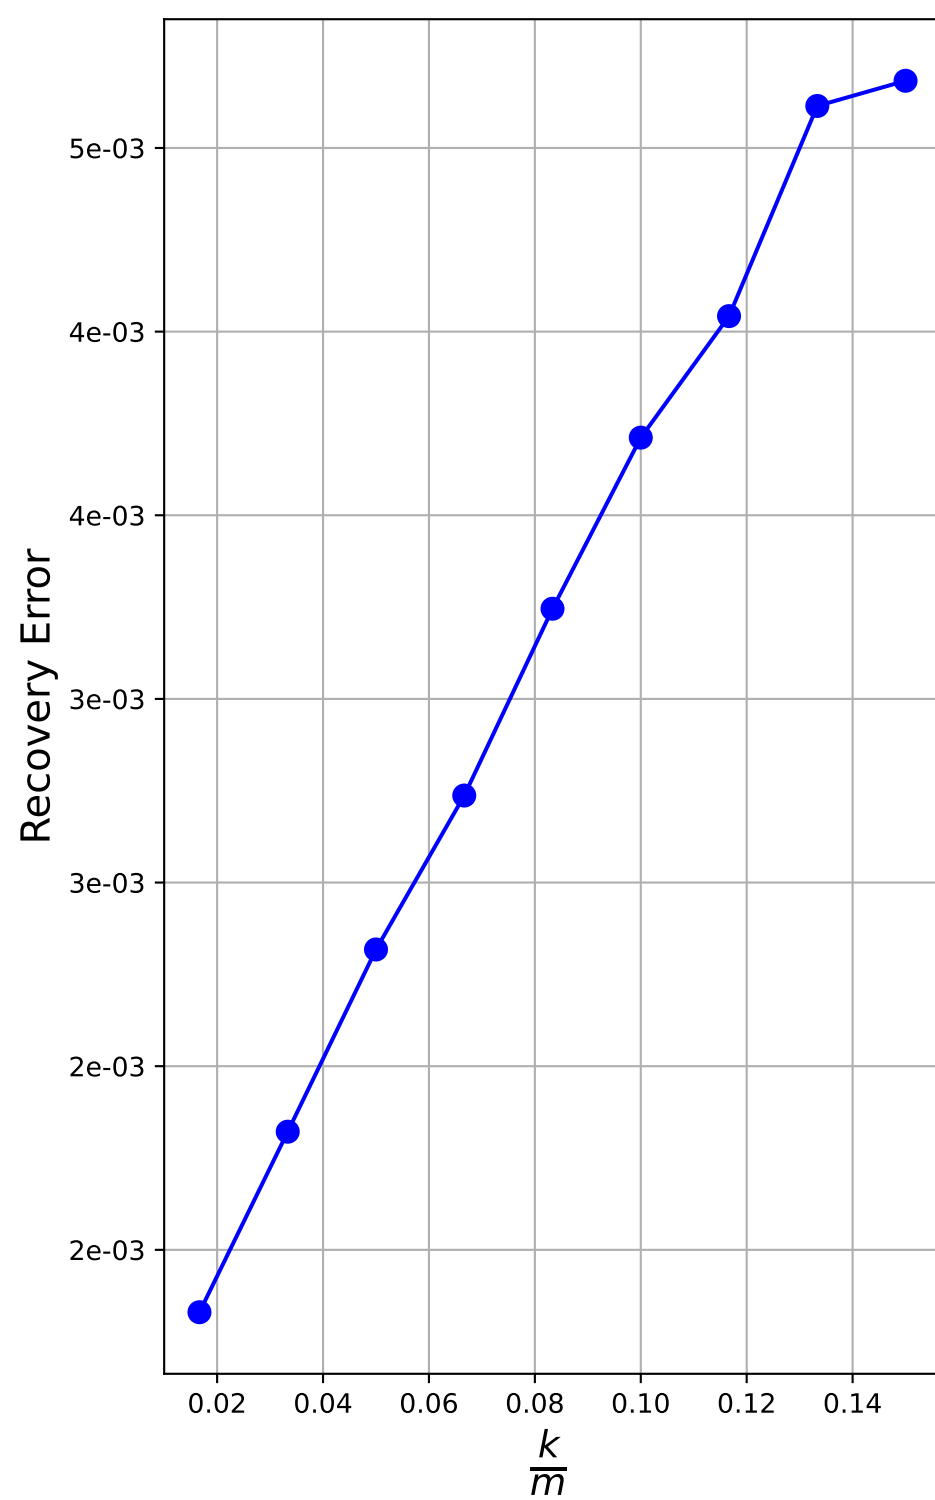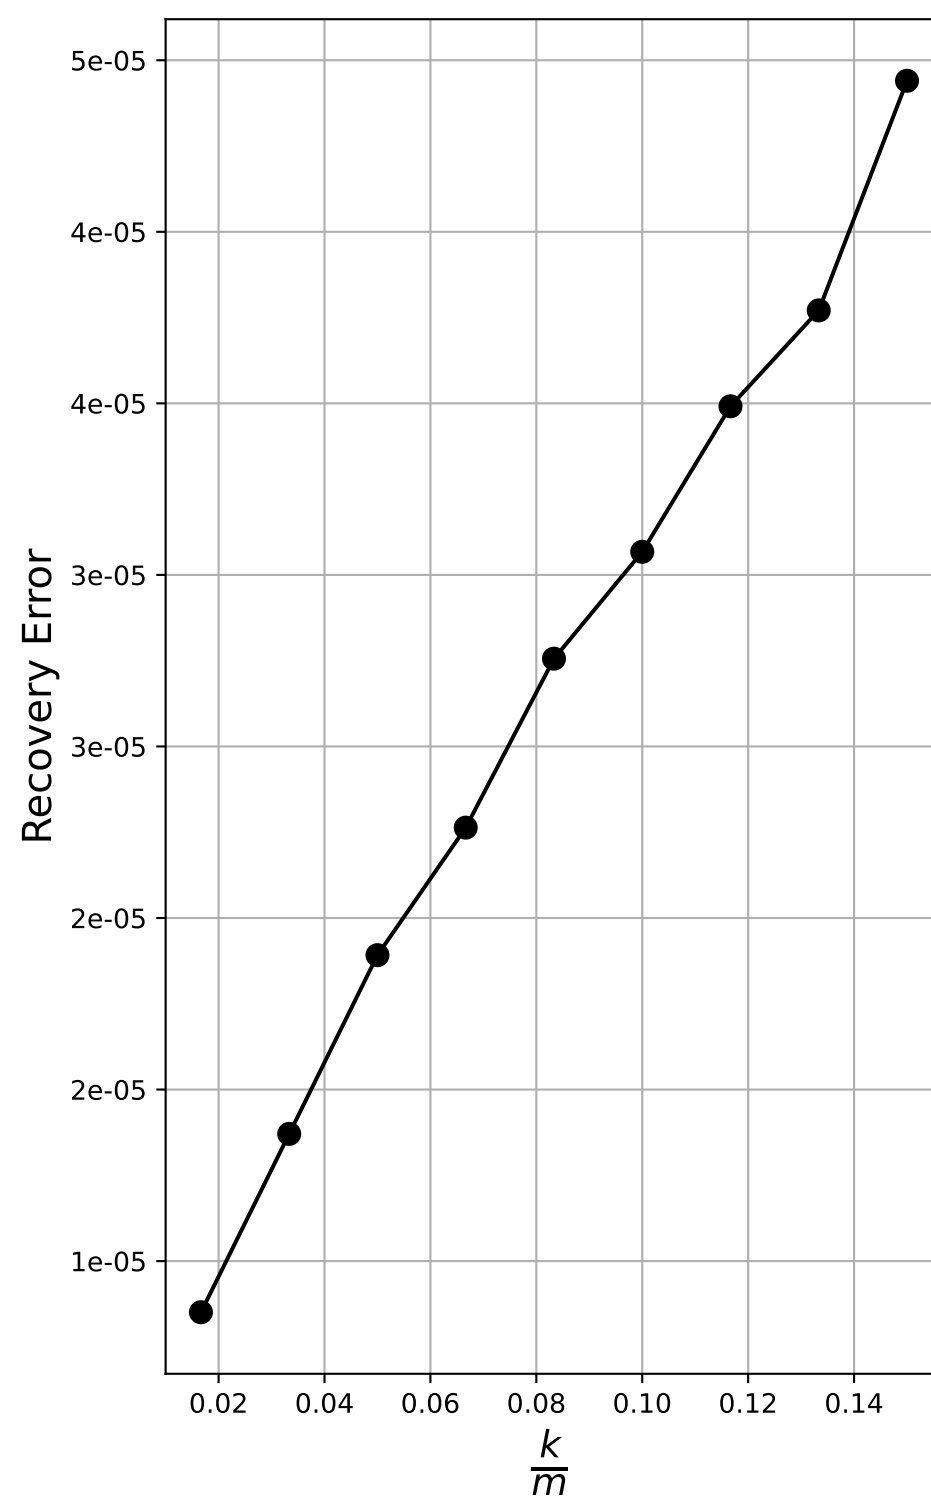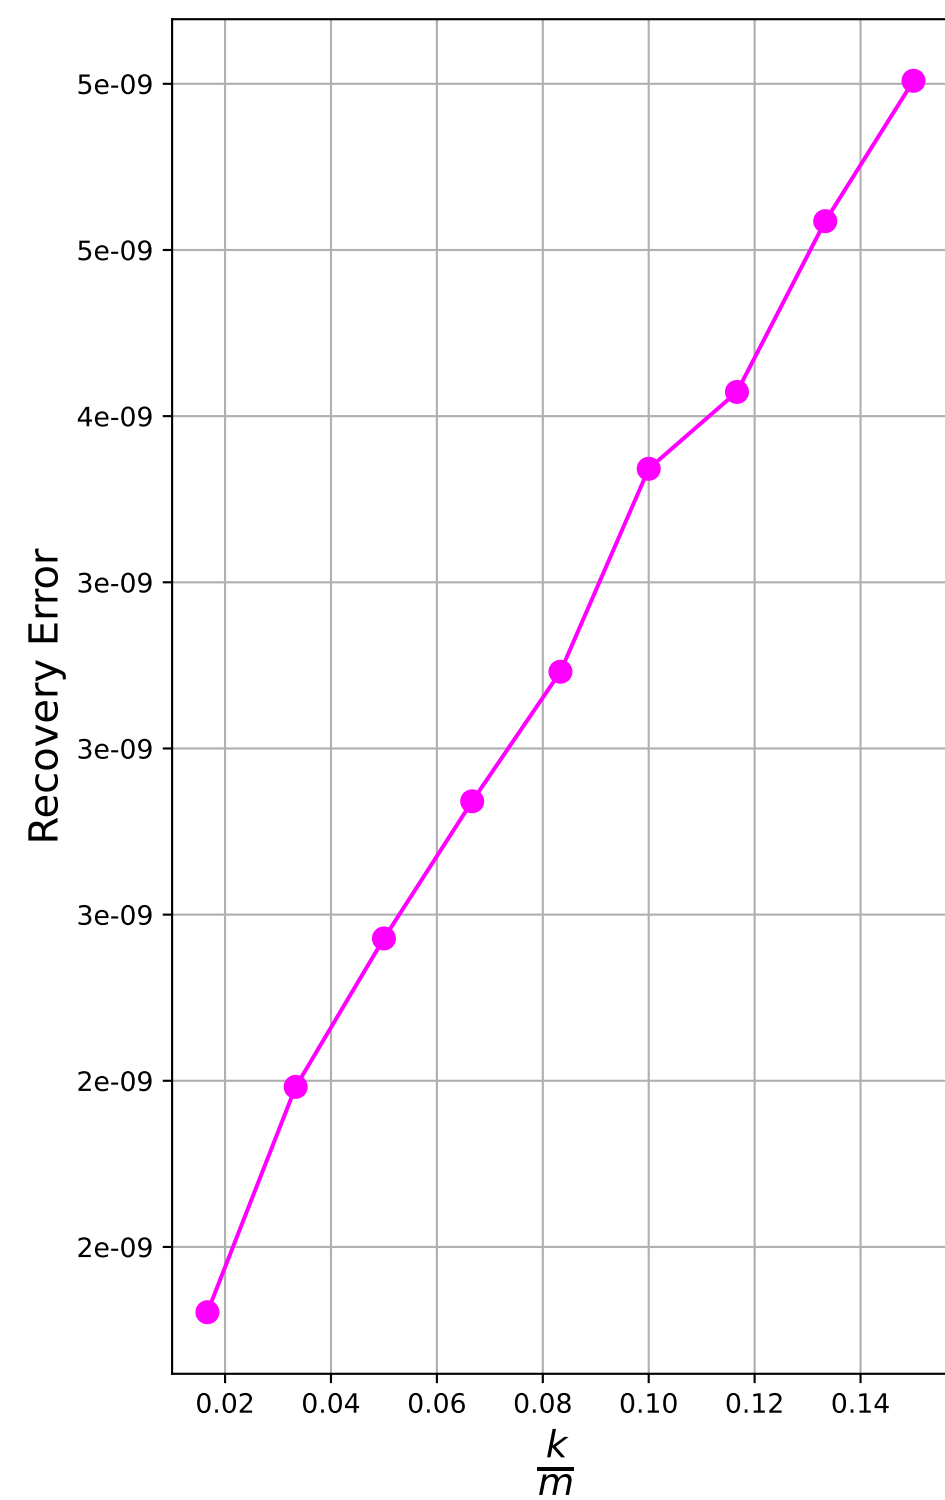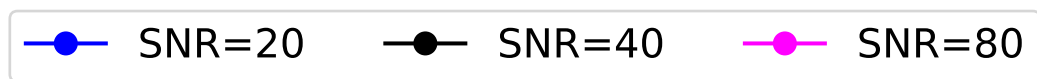

Supplement: supplementary_material [file attachment]

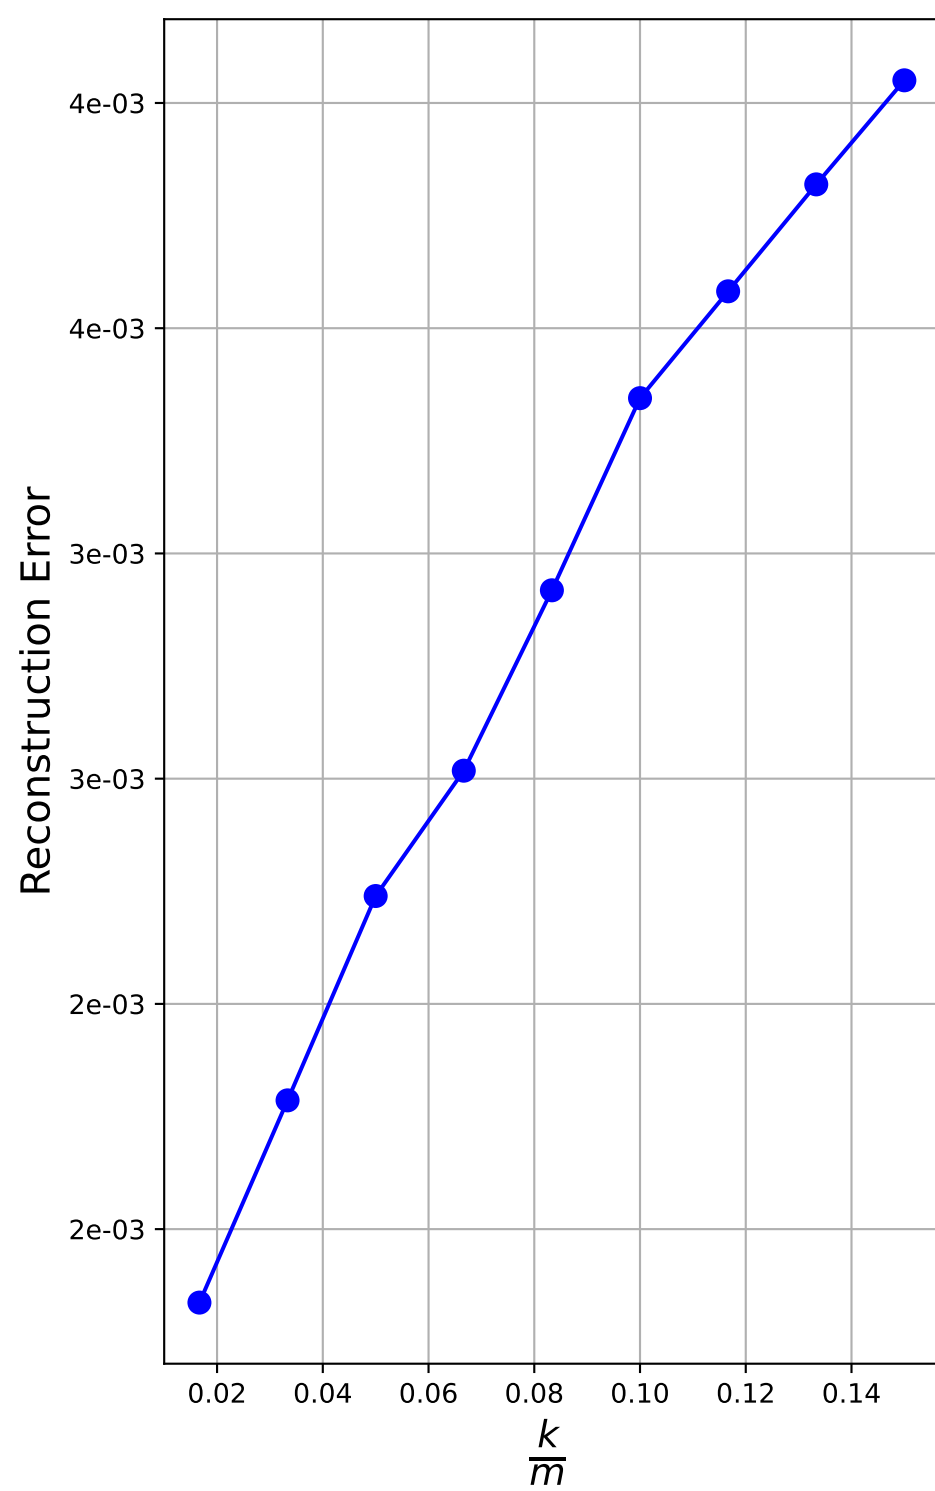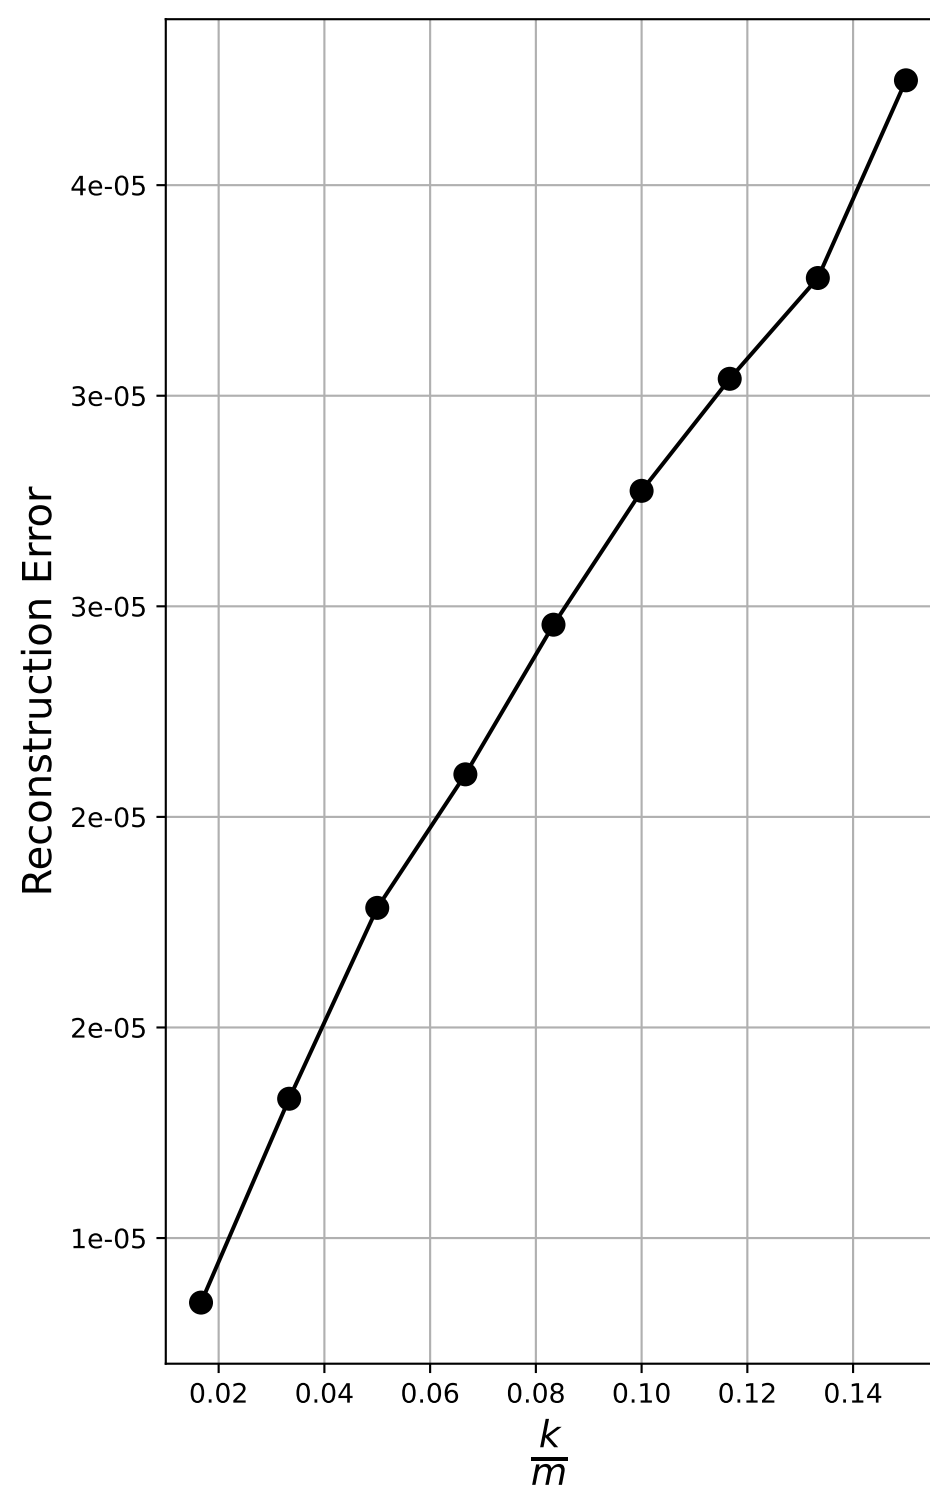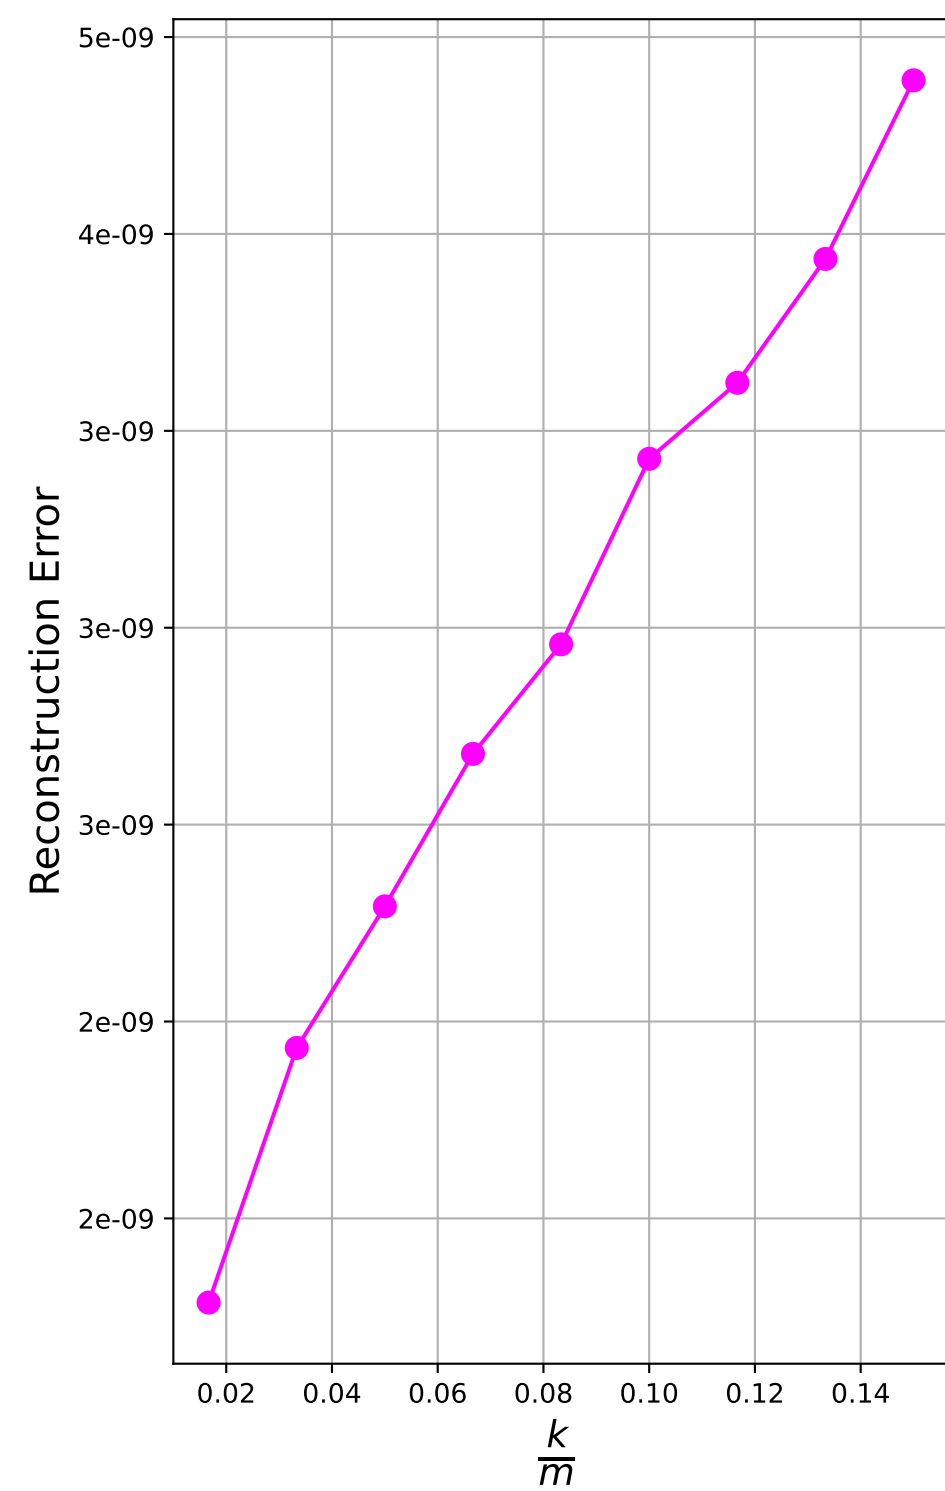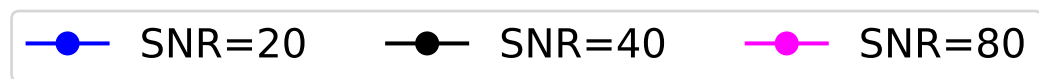

Supplement: supplementary_material [file attachment]

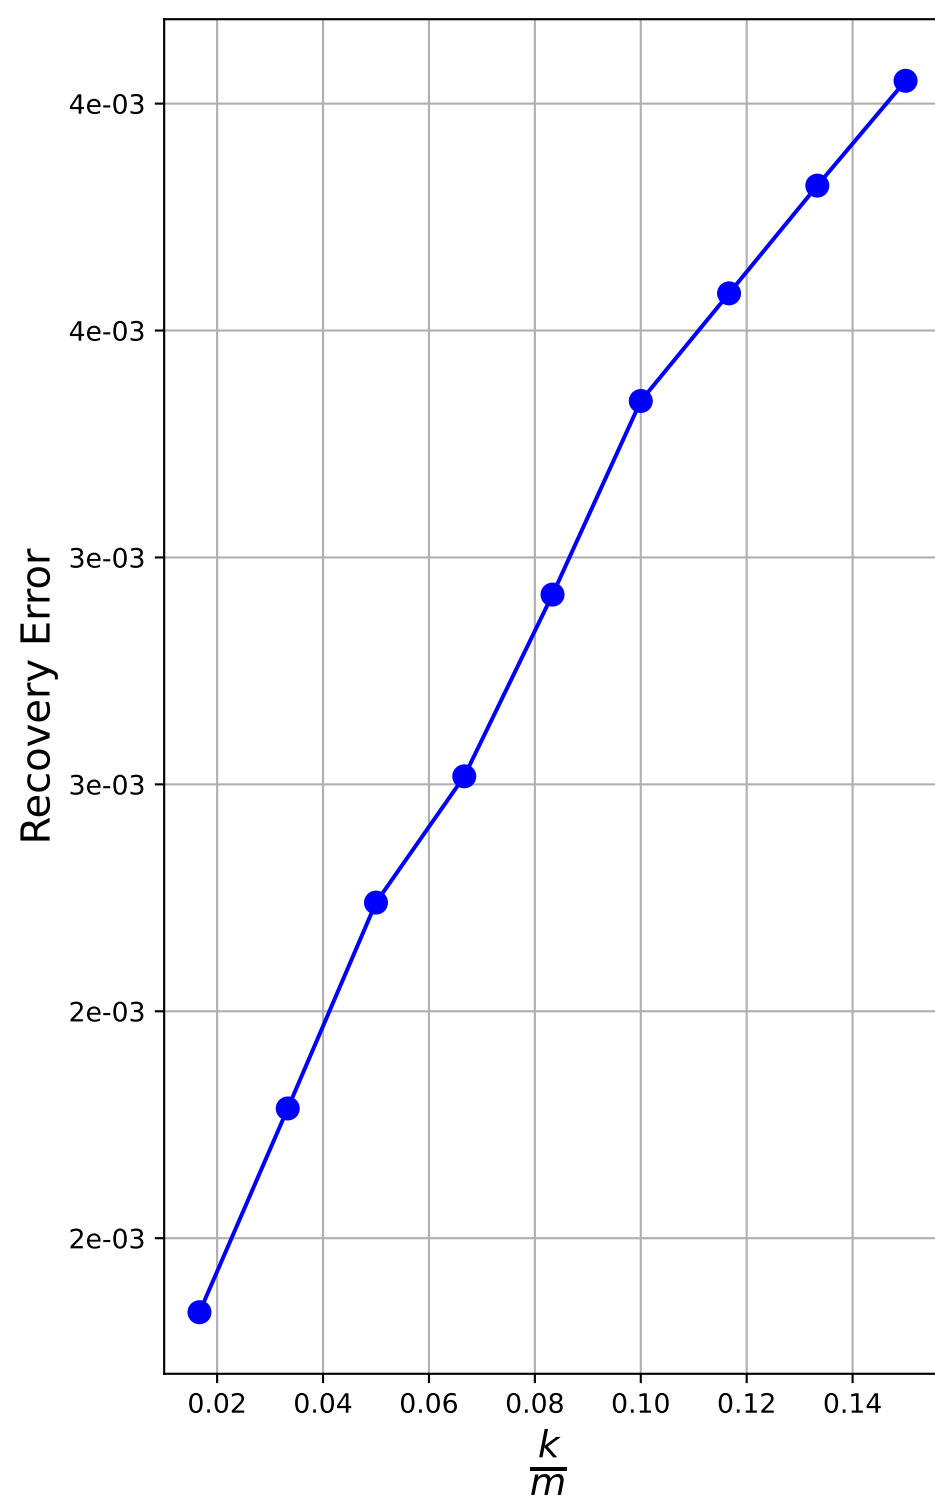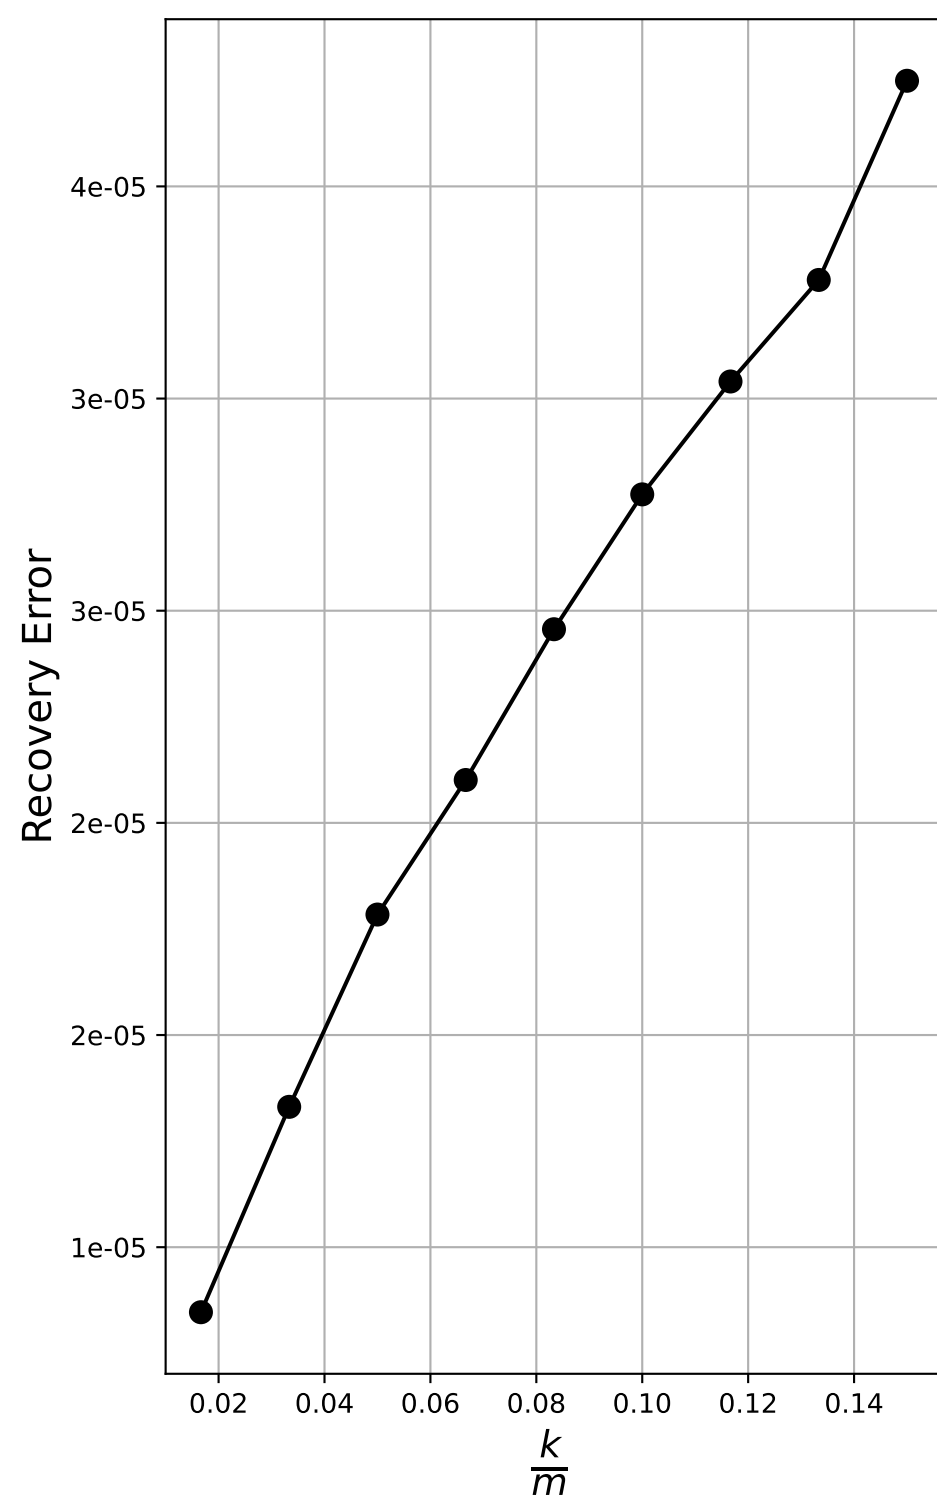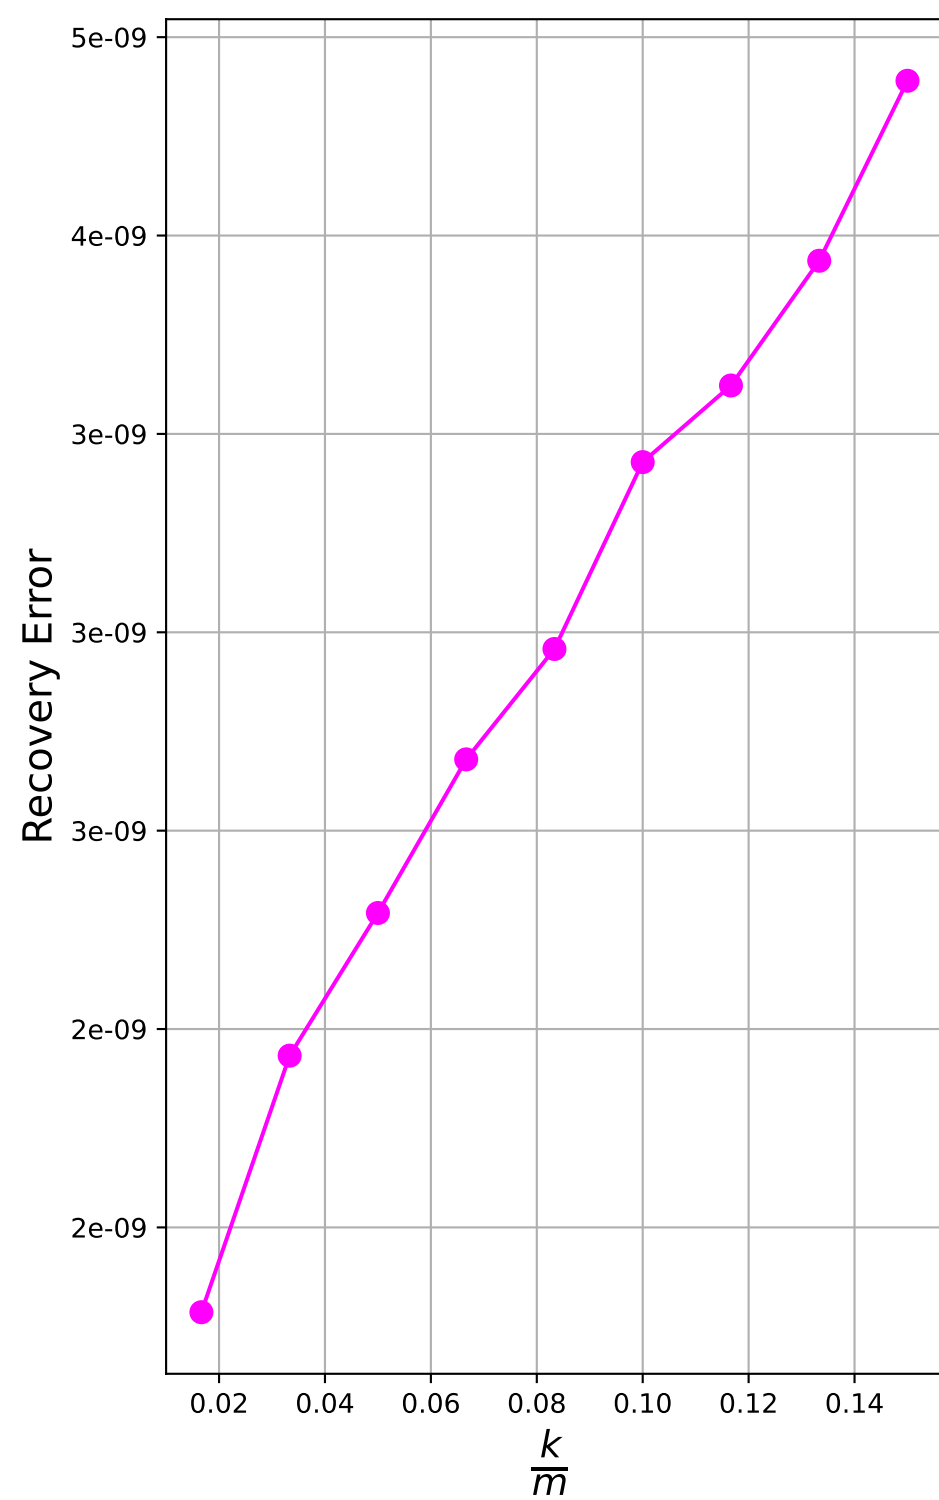

Supplement: supplementary_material [file attachment]
